# Supplementary material for: Habitat Discontinuities Separate Genetically Divergent Populations of a Rocky Shore Marine Fish
Source: PubMed Central journal article supplement (PMC5051803; doi:10.1371/journal.pone.0163052), 2016-10-05

**S1 Fig.** Allele frequencies and size distributions among corkwing wrasse sampling localities at nine microsatellite markers. The size of the bubble corresponds to the frequency of the respective allele in the sample.

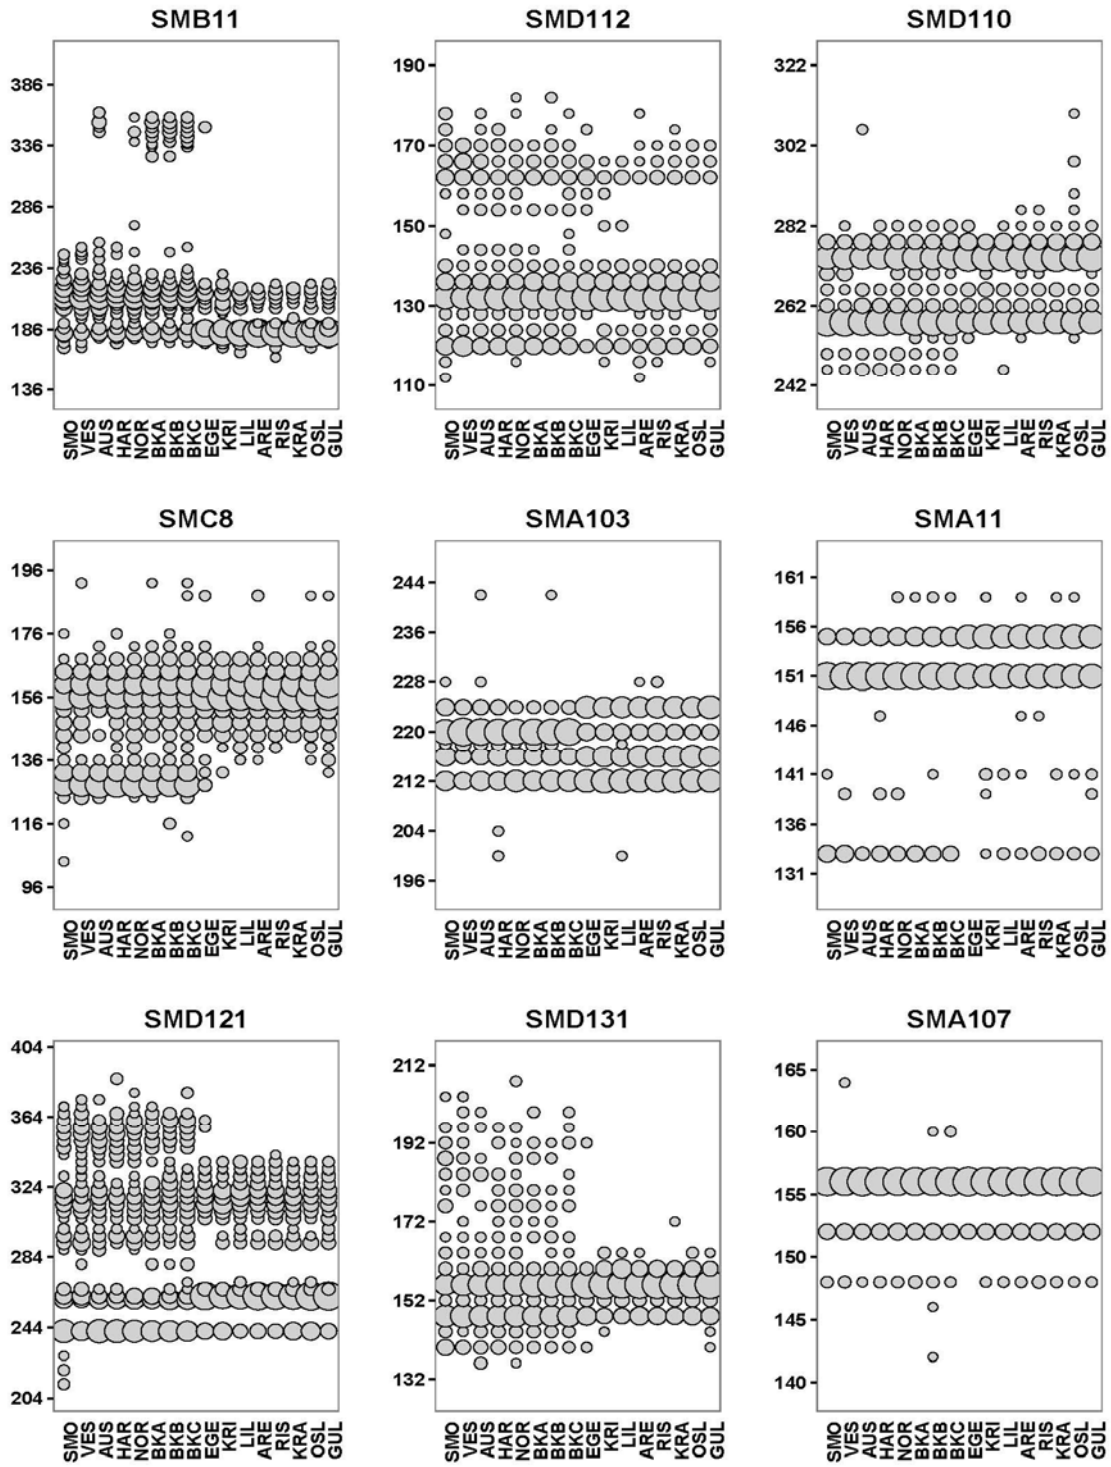

Supplement: pone.0163052.s001.pdf [file pone.0163052.s001.pdf]
