# Supplementary material for: Habitat Discontinuities Separate Genetically Divergent Populations of a Rocky Shore Marine Fish
Source: PubMed Central journal article supplement (PMC5051803; doi:10.1371/journal.pone.0163052), 2016-10-05
Supplement: pone.0163052.s003.pdf [file pone.0163052.s003.pdf]

**S1 Table.** Genetic variability at nine microsatellite loci.  $A$  = number of alleles,  $H_T$  = gene diversity in the total material;  $F_{ST}$  = estimate of  $\theta$  (Weir & Cockerham 1984). Numbers in bold indicate statistical significant tests at 1% level after the False Discovery Rate approach (Benjamini & Hochberg 1995).

| Locus Name | $A$  | $H_T$ | $F_{ST}$     |
|------------|------|-------|--------------|
| SMB11      | 36   | 0.794 | <b>0.135</b> |
| SMD112     | 19   | 0.667 | <b>0.018</b> |
| SMD110     | 15   | 0.659 | <b>0.023</b> |
| SMC8       | 19   | 0.832 | <b>0.049</b> |
| SMA103     | 9    | 0.745 | <b>0.097</b> |
| SMA11      | 7    | 0.531 | <b>0.069</b> |
| SMD121     | 33   | 0.877 | <b>0.070</b> |
| SMD131     | 19   | 0.622 | <b>0.059</b> |
| SMA107     | 7    | 0.253 | -0.001       |
| Average    | 18.2 | 0.665 | <b>0.064</b> |
| SD         | 10.5 |       |              |
